# Supplementary material
Source: HighWire-hosted journal article supplement (https://erj.ersjournals.com/content/55/2/1900990)
Supplement: inline-supplementary-material-2 [file inline-supplementary-material-2.pdf]

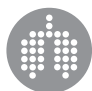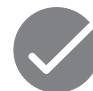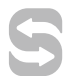

SHAREABLE PDF

# Dietary antioxidant intake in school age and lung function development up to adolescence

Emmanouela Sdona <sup>1</sup>, Jenny Hallberg <sup>1,2,3</sup>, Niklas Andersson <sup>1</sup>, Sandra Ekström <sup>1,4</sup>, Susanne Rautiainen <sup>5,6</sup>, Niclas Håkansson <sup>1</sup>, Alicja Wolk <sup>1,7</sup>, Inger Kull <sup>1,2,3</sup>, Erik Melén <sup>1,2,3</sup> and Anna Bergström <sup>1,4</sup>

**Affiliations:** <sup>1</sup>Institute of Environmental Medicine, Karolinska Institutet, Stockholm, Sweden. <sup>2</sup>Sachs' Children's Hospital, Södersjukhuset, Stockholm, Sweden. <sup>3</sup>Dept of Clinical Science and Education, Södersjukhuset, Karolinska Institutet, Stockholm, Sweden. <sup>4</sup>Centre for Occupational and Environmental Medicine, Region Stockholm, Stockholm, Sweden. <sup>5</sup>Global and Sexual Health, Dept of Public Health Sciences, Karolinska Institutet, Stockholm, Sweden. <sup>6</sup>Division of Preventive Medicine, Brigham and Women's Hospital, Boston, MA, USA. <sup>7</sup>Dept of Surgical Sciences, Uppsala University, Uppsala, Sweden.

**Correspondence:** Emmanouela Sdona, Institute of Environmental Medicine, Karolinska Institutet, Box 210, SE-171 77 Stockholm, Sweden. E-mail: emmanouela.sdona@ki.se

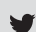

@ERSpublications

Dietary antioxidant intake at school age may influence lung function development as measured by FEV<sub>1</sub> up to adolescence among children with asthma. In contrast, no association was observed among children without asthma. <http://bit.ly/2CzEZ8W>

**Cite this article as:** Sdona E, Hallberg J, Andersson N, *et al.* Dietary antioxidant intake in school age and lung function development up to adolescence. *Eur Respir J* 2020; 55: 1900990 [https://doi.org/10.1183/13993003.00990-2019].

This single-page version can be shared freely online.

**ABSTRACT** Dietary antioxidant intake has been hypothesised to influence lung function. The association between total antioxidant capacity (TAC) of the diet at age 8 years and lung function development up to 16 years in 2307 participants from the Swedish population-based birth cohort BAMSE (Children, Allergy, Milieu, Stockholm, Epidemiology) was investigated.

Information on TAC was obtained from a food frequency questionnaire at 8 years. Lung function was measured by spirometry at 8 and 16 years, impulse oscillometry (IOS) and exhaled nitric oxide fraction ( $F_{eNO}$ ) at 16 years. Low lung function was defined as forced expiratory volume in 1 s (FEV<sub>1</sub>) z-score below the 25th percentile. Longitudinal associations between TAC and lung function were analysed by mixed effect models adjusted for potential confounders. Stratification by asthma at 8 years was performed to examine effect modification.

The median TAC intake was 10067  $\mu\text{mol}$  Trolox equivalents (TE)·g<sup>-1</sup>, with males having a lower mean compared to females (9963 *versus* 10819  $\mu\text{mol}$  TE·g<sup>-1</sup>). In analyses of lung function change between 8 and 16 years, there were no statistically significant associations between TAC in tertiles and spirometry results for the total study population. Among children with asthma at 8 years (prevalence 7%), higher TAC was associated with higher mean FEV<sub>1</sub> (0.46 SD, 95% CI 0.11–0.80) and decreased odds of low lung function at 16 years (OR 0.28, 95% CI 0.12–0.65). There were no associations between TAC and forced vital capacity or IOS/ $F_{eNO}$  results.

High dietary antioxidant intake in school age may be associated with improved lung function development from school age to adolescence among children with asthma.
